# Supplementary material
Source: PubMed Central journal article supplement (PMC333410)
Supplement: 1475-4924-2-28-s1.pdf [file 1475-4924-2-28-s1.pdf]

Tos3 11 ..LPRSSLLYNNASNSSSRRIKETRKVKLLYNPLTKR.....Q...ILNNFEILATLGNQG  
Pak1 94 ..TPTTTSSFCSSGSSSKNKVKETNRISLTYDPVSKR.....K...VLNTYEI IKELGHGQ  
CaMKKβ 121 CICPSLPYSPVSSPQSSPRLPRRPVESHHSVITGM.....QDCVQLNQYTLKDEIGKGS  
LKB1 7 QQLGMFTTEGELMSVGMDFTHRIDSTEVIYQP..RR.....KRAKLI GKYLMDLLGEGS  
Elm1 39 TSSFSSFSQQKPTYSTIIGENIHITLDEIRPYVKKITVSDQDKKTINQYTLGVSAGSGQ  
Consensus 121 p ss s s ss rik tv l y pltkr q ilnny i lG Gq

Tos3 61 YGKVKLARDLGTGALVAIKILNRFEKRS....GYSL.....QLKV.EN.....  
Pak1 144 HGKVKLARDILSKQLVAIKIVDRHEKKQRKFFTFIK.....SSKISEN.....  
CaMKKβ 176 YGVVKLAYNENDNTYYAMKVLSK..KKLIRQAGFPR.....RPPPRGTRPAPGGCIQP  
LKB1 60 YGKVKEVLDSETLCRRRAVKILKK..KKLRR.....I  
Elm1 99 FGVVRKAYSSTLGGVAVKIIIPKPKPNAQQYSVNQVMRQIQLWKS KGIITNMSGNEAMR  
Consensus 181 yGkVkla d t lvAiKil k kk k y k

Tos3 99 ....PRVNQEI EVMKRCHHE.NVVELYEILNDPESTKVYL VLEYCSRGPVKWC PENKMEI  
Pak1 187 ....DKIKREI AIMKKCHHK.HVVQLIEVLDD LKSRKIYLVLEYCSRGEV KWCPPDCMES  
CaMKKβ 227 RGP I E Q V Y Q E I A I L K K L D H P . N V V K L V E V L D D P N E D H L Y M V F E L V N Q G P V . . . . . M E V  
LKB1 89 PNGEANVKK E I Q L L R R L R H K . N V I Q L V D V L Y N E E K Q K M Y M V M E Y C . . . . . V C G M Q E M . L  
Elm1 159 LMNIEKCRWEI FAASRLRNNVHIVRLIECLDSPFSES I W I V T N W C S L G E L Q W K R D D E D I  
Consensus 241 drvk EI vmkrlhh nvv LievLddp s kvylVleycs g v wc mei

Tos3 154 .KAVGPSILTFQQ....SRKVLDVVS GLEYLHSQGI THRD IKPSNLLISNGTV .KISD  
Pak1 242 .DAKGPSLLSFQE....TREILRGVVL GLEYLHYQGI IHRDIK PANLLISGDGTV .KISD  
CaMKKβ 279 .PTLKP..LSEDQ....ARFYFQDLIKGIEYLHYQKIIHRDIKPSNLLVGEDGHI .KIAD  
LKB1 141 .DSVPEKRFVVCQ....AHGYFCQLIDGLEYLHSQGI VHKDIKPNLLLTGGTL .KISD  
Elm1 219 LPQWKKI V I S N C S V S T F A K K I L E D M T K G L E Y L H S Q G C I H R D I K P S N I L L D E E K V A K L S D  
Consensus 301 v p ils q ar vv dvv GLEYLHsQgiiHrDIKPsNllis dgtv KisD

Tos3 208 FG..VAM.STATGSTNIQSSHEQLLKSRALGTPAFFAPEL CSTEKEY.....  
Pak1 296 FG..VSLAASSTNSSDSSESLDELELAKTVGTPAFFAPEMCLGEDAFTRYNLTKENLFRG  
CaMKKβ 331 FG..V.....SNEFKGS..DALLSNTVGT PAFMAPELS.....ETRKIFSG  
LKB1 195 LG..VAEALHPFAADDTCRTSQ.....GSPAFQPEIANGLDTF S.....  
Elm1 279 FGSCI FTPQS L P F S D A N F E D C F Q R E L N K I V G T P A F I A P E L C H L G N S K R D F V T D . . . . .  
Consensus 361 fG v t s d s l r vGtPAF aPElc y

Tos3 252 SC.SSAIDIWSLGV TIYCLLFGKLPFNANSGLELFD SIINKPLEFP SYEMLNGATSGIT  
Pak1 354 SCISFMIDIWAVGVTLYCLLFGMLPFFSDFELKLF EKIVNDPLKFP TFKEIQSNKVS KVS  
CaMKKβ 369 K...ALDVWAMGVTLYCFVFGQCPFMDERIMCLHSKIKSQALEFPDQPDIA.....  
LKB1 233 ...GFKVDIWSAGVTLYNITGLYPFEGDN IYKLFENI GKGSYAI P.....  
Elm1 332 ...GFKLDIWSLGV TIYCLLYNE L P F F G E N E F E T Y H K I I E V S L S S K I N G N T L N D L V I K R L  
Consensus 421 f iDiWslGV TIYcllfg lPF ad l lfdkIi l fp em

Tos3 311 M.EEYT...DAKD L L K K L L Q K D P D K R I K L A D I K V H P F M C . . . . . H Y G K S D A A S V L . . . . . T N  
Pak1 414 CEEYE...MAKD L L L K L L E K N P Q K R M T I P A I K K H P F V S . W D F D H V P E N D E K L L S . . . . . S V  
CaMKKβ 417 ....E...DLKD L I T R M L D K N P E S R I V V P E I K L H P W V T R H G A E P L P S E D E N C T L V E V T E  
LKB1 276 .GDCGP...PLSDLLKGMLE YEP AKRFSIRQIRQHSWFRK..KHPPAEAPVPIPPSPDT  
Elm1 389 LEKDVTLRISIQDLVKVLSRDQP IDSRNHSQISSSS.VNPVRNEGPVRRFFGRLLTKK GK  
Consensus 481 ee lkDlkkllleknP kri l Ik hpfv dh p d vl t

Tos3 359 LETFHELKVSPP.....SSCKRVELVSLPVNS SFASLDSVYMENFDHNNLRTGADRNS  
Pak1 467 LE..QK L R F . . . . . Q C N Q T D Q F E . P I S I S K H E L K N A V . . . . . S G V G K K I K E S V  
CaMKKβ 469 EEVENSVKHIPSLATVILVKT MIRKRSFGNPFEGSRREERSLSAPGNLLTKQG SEDNLQG  
LKB1 329 KDRWRSMTVVPYLEDLHGADEDEDLFDIEDDI IYTDQDF TVPGQVPEEEASHNGQRRGLPK  
Elm1 448 KKTSGKGKDKVLVSATSKVTPSIHIDE EPDKECFSTT V L R S S P D S S D Y C S S L G E E A I Q V T  
Consensus 541 e lk p l rve pv s lks s lg
