# Supplementary material
Source: PubMed Central journal article supplement (PMC333410)
Supplement: 1475-4924-2-28-s2.pdf [file 1475-4924-2-28-s2.pdf]

|                     |     |        |             |     |        |         |                 |            |
|---------------------|-----|--------|-------------|-----|--------|---------|-----------------|------------|
|                     |     |        | -11         | -9  |        |         | -2              |            |
|                     |     |        | -12         | -10 |        | -5      | -3              | P          |
|                     |     |        | ↓           | ↓   | ↓      | ↓       | ↓               | ↓          |
| PKA-C $\alpha$      | 239 | DFGF   | AKR         | .   | V.KG   | .RTW    | TL              | CGTPEYLAPE |
| PKC $\alpha$        | 539 | DFGM   | CKEHMM      | .   | DGVTRR | TFCG    | TPDYIAPE        |            |
| NuaK1               | 196 | DFGLSN | LYQKDK      | .   | FLQT   | FCGSP   | LYASPE          |            |
| NuaK2               | 237 | DFGLSN | LYHQGK      | .   | FLQT   | FCGSP   | LYASPE          |            |
| BrsK1               | 190 | DFGMAS | LQVGDS      | .   | LL     | ETSCGSP | HYACPE          |            |
| BrsK2               | 159 | DFGMAS | LQVGDS      | .   | LL     | ETSCGSP | HYACPE          |            |
| SIK                 | 167 | DFGFGN | FYKSGE      | .   | PL     | STWCGSP | PYAAP           |            |
| QIK                 | 160 | DFGFGN | FYKSGE      | .   | LL     | ATWCGSP | PYAAP           |            |
| AtSnRK1- $\alpha$ 1 | 160 | DFGLSN | IMRDGH      | .   | FL     | KTSCGSP | NYAAP           |            |
| AtSnRK1- $\alpha$ 2 | 161 | DFGLSN | VMRDGH      | .   | FL     | KTSCGSP | NYAAP           |            |
| AMPK- $\alpha$ 1    | 159 | DFGLSN | MMSDGE      | .   | FL     | R       | TSCGSPNYAAP     |            |
| AMPK- $\alpha$ 2    | 157 | DFGLSN | MMSDGE      | .   | FL     | R       | TSCGSPNYAAP     |            |
| ScSnf1              | 195 | DFGLSN | IMTDGN      | .   | FL     | KTSCGSP | NYAAP           |            |
| QSK                 | 206 | DFGF   | SNLFTPGQ    | .   | LL     | KT      | WCGSPPYAAP      |            |
| MELK                | 150 | DFGL   | CAKPKGKDYHL | Q   | T      | CCGSLA  | YAAP            |            |
| PAR1A               | 219 | DFGF   | SNEFTVGG    | .   | KL     | D       | TFCGSPPYAAP     |            |
| Consensus           | 243 | DFGL   | snl         |     | g      |         | fL TsCGSp YAaPE |            |
